# Supplementary material for: Genome Sequence of the Bacteriophage CL31 and Interaction with the Host Strain Corynebacterium glutamicum ATCC 13032
Source: Viruses. 2021 Mar 17;13(3):495. doi: 10.3390/v13030495 (PMC8002715; doi:10.3390/v13030495)
Supplement: Supplementary file 1 [file viruses-13-00495-s001.zip]

Archive with 4 entries (4 files):
- 20210310_CL31_Hünnefeld_Viruses_SI.pdf
- Table_S3.xlsx
- Table_S4.xlsx
- Table_S5.xlsx
